# Supplementary material
Source: Springer Nature journal article supplement (https://www.springermedizin.de/resource/supplementary/12889_2012_4945_MOESM1_ESM.pdf/9496192)
Supplement: MOESM1 [file 9496192]

## Quality Assessment Checklist

| <b>Reference</b>            | <b>1</b> | <b>2</b> | <b>3</b> | <b>4</b> | <b>5</b> | <b>6</b> | <b>7</b> | <b>8</b> | <b>TOTAL</b> |
|-----------------------------|----------|----------|----------|----------|----------|----------|----------|----------|--------------|
| Bourbonnais et al., 2005    | 1        | 1        | 1        | 1        | 1        | 1        | 1        | 1        | 8            |
| Taxman & Gordon, 2009       | 0        | 1        | 1        | 1        | 1        | 1        | 1        | 1        | 7            |
| Summerlin et al., 2010      | 0        | 1        | 1        | 0        | 0        | 0        | 1        | 1        | 4            |
| Neveu, 2007                 | 1        | 1        | 1        | 1        | 1        | 1        | 1        | 1        | 8            |
| Moon & Maxwell, 2004        | 1        | 1        | 1        | 0        | 1        | 1        | 1        | 0        | 6            |
| Lavigne & Bourbonnais, 2010 | 1        | 1        | 1        | 1        | 1        | 1        | 1        | 1        | 8            |
| Griffin, 2006               | 0        | 1        | 1        | 0        | 1        | 1        | 1        | 1        | 6            |
| Castle & Martin, 2006       | 0        | 1        | 1        | 0        | 1        | 1        | 1        | 1        | 6            |
| Bourbonnais et al., 2007    | 1        | 1        | 1        | 1        | 1        | 1        | 1        | 1        | 8            |
| Armstrong & Griffin, 2004   | 0        | 1        | 1        | 1        | 1        | 1        | 1        | 1        | 7            |
| Castle, 2008                | 0        | 1        | 1        | 1        | 1        | 1        | 1        | 1        | 7            |

### Quality Assessment Criterion:

1 = Study's sample is representative of the population of corrections officers

2 = Methods of data collection are described

3 = Validated measures are used

4 = Confounders are mentioned and accounted for in the analysis

5 = The statistical method used is appropriate for the outcome studied

6 = Statistical significance of the association(s) are tested and relevant parameters are presented

7 = The author(s) answered their research question

8 = There is a discussion of study limitations, including biases, and the way in which the study may have been affected as a result
